# Supplementary material
Source: HighWire-hosted journal article supplement (https://bmjophth.bmj.com/content/4/1/e000246)
Supplement: inline-supplementary-material-1 [file inline-supplementary-material-1.docx]

| **Primer Name** | **Primer Sequence (5’ – 3’)** | **Primer Length (bp)** | **Amplicon Size** |
| --- | --- | --- | --- |
| F_NXT_Bakt_341F | CCTACGGGNGGCWGCAG | 17 | 464 bp |
| R_NXT_Bakt_805R | GACTACHVGGGTATCTAATCC | 21 | 464 bp |
| F_NXT_18S_574f | CGGTAAYTCCAGCTCYV | 17 | 323 bp |
| R_NXT_18S_897r | TCYDAGAATTYCACCTCT | 18 | 323 bp |

Supp. Table 1: 16S and 18S rRNA primer information
